# Supplementary material
Source: PubMed Central journal article supplement (PMC4017620)
Supplement: NIHMS572670-supplement-Supplement1.pdf [file NIHMS572670-supplement-Supplement1.pdf]

## Supplementary Appendix

This appendix has been provided by the authors to give readers additional information about their work.

Supplement to: Cunningham SA, Kramer MR, Narayan KMV. Incidence of childhood obesity in the United States. *N Engl J Med* 2014;370:403-11. DOI: 10.1056/NEJMoa1309753

## Supplementary Appendix

### Table of contents

Table S1. National prevalence of overweight among children ages 5 to 14 years in 1998-2007 by age

Table S2. Inter-wave incidence proportion of obesity, 1998-2007, by weight in Kindergarten

Table S3. Incidence density of obesity between Kindergarten and 8th grade, ages 5 to 14, by weight in Kindergarten

Table S3: Proportion of incident obese 8th graders by weight in Kindergarten

**Table S1. National prevalence of overweight among children ages 5 to 14years in 1998-2007 by age**

|                                      | N    | Fall K<br>(mean age 5.6) |        |      | Spring K<br>(mean age 6.1) |        |      | Fall 1st <sup>a</sup><br>(mean age 6.6) |        |      | Spring 1st<br>(mean age 7.1) |        |      | Spring 3rd<br>(mean age 9.1) |        |      | Spring 5th<br>(mean age 11.1) |        |      | Spring 8th<br>(mean age 14.1) |        |      |
|--------------------------------------|------|--------------------------|--------|------|----------------------------|--------|------|-----------------------------------------|--------|------|------------------------------|--------|------|------------------------------|--------|------|-------------------------------|--------|------|-------------------------------|--------|------|
|                                      |      | Prev                     | 95% CI |      | Prev                       | 95% CI |      | Prev                                    | 95% CI |      | Prev                         | 95% CI |      | Prev                         | 95% CI |      | Prev                          | 95% CI |      | Prev                          | 95% CI |      |
| TOTAL                                | 7738 | 14.9                     | 13.6   | 16.4 | 14.3                       | 12.8   | 15.8 | 12.9                                    | 10.8   | 15.3 | 13.3                         | 12.1   | 14.7 | 15.9                         | 14.5   | 17.4 | 19.0                          | 17.1   | 20.9 | 17.0                          | 15.6   | 18.5 |
| MALE                                 | 3865 | 14.5                     | 12.7   | 16.6 | 12.9                       | 11.0   | 15.0 | 12.1                                    | 9.1    | 16.0 | 12.3                         | 10.5   | 14.4 | 16.5                         | 14.5   | 18.7 | 19.5                          | 16.9   | 22.3 | 15.8                          | 13.7   | 18.2 |
| FEMALE                               | 3873 | 15.3                     | 13.4   | 17.5 | 15.8                       | 13.9   | 17.9 | 13.6                                    | 11.0   | 16.7 | 14.5                         | 12.6   | 16.5 | 15.3                         | 13.5   | 17.3 | 18.4                          | 16.1   | 20.9 | 18.4                          | 16.5   | 20.4 |
| SES Q1 <sup>b</sup>                  | 1025 | 17.0                     | 13.6   | 21.1 | 15.5                       | 12.3   | 19.5 | 12.5                                    | 8.1    | 18.8 | 13.7                         | 10.1   | 18.4 | 16.5                         | 13.5   | 20.0 | 21.7                          | 17.9   | 26.0 | 20.8                          | 17.4   | 24.7 |
| SES Q2                               | 1278 | 14.7                     | 12.1   | 17.7 | 13.8                       | 11.1   | 17.1 | 12.2                                    | 7.7    | 18.6 | 14.9                         | 11.6   | 18.8 | 15.8                         | 12.6   | 19.6 | 17.5                          | 14.5   | 21.0 | 15.5                          | 12.4   | 19.1 |
| SES Q3                               | 1484 | 16.8                     | 13.7   | 20.4 | 14.8                       | 12.0   | 18.1 | 12.4                                    | 8.5    | 17.6 | 13.0                         | 10.3   | 16.3 | 16.6                         | 13.5   | 20.2 | 21.4                          | 18.1   | 25.2 | 19.2                          | 16.0   | 23.0 |
| SES Q4                               | 1594 | 14.8                     | 11.6   | 18.6 | 13.5                       | 10.6   | 17.0 | 13.8                                    | 9.0    | 20.6 | 13.2                         | 10.3   | 16.7 | 14.5                         | 10.9   | 19.2 | 16.6                          | 13.4   | 20.3 | 15.5                          | 12.4   | 19.1 |
| SES Q5                               | 2047 | 12.1                     | 9.9    | 14.8 | 13.9                       | 11.2   | 17.2 | 12.3                                    | 8.7    | 17.0 | 12.5                         | 10.3   | 15.0 | 15.9                         | 12.7   | 19.8 | 16.8                          | 13.7   | 20.4 | 13.1                          | 11.1   | 15.4 |
| Non-Hispanic White                   | 4822 | 13.6                     | 11.9   | 15.5 | 13.5                       | 11.7   | 15.5 | 11.1                                    | 8.7    | 14.0 | 12.6                         | 10.9   | 14.6 | 15.6                         | 13.7   | 17.7 | 17.8                          | 15.5   | 20.3 | 15.4                          | 13.9   | 17.1 |
| Non-Hispanic Black                   | 762  | 17.2                     | 13.5   | 21.6 | 15.8                       | 12.2   | 20.3 | 19.1                                    | 12.6   | 27.7 | 14.3                         | 10.8   | 18.6 | 14.2                         | 10.9   | 18.3 | 20.2                          | 16.4   | 24.5 | 18.7                          | 13.8   | 24.8 |
| Hispanic                             | 1301 | 17.2                     | 14.3   | 20.4 | 14.9                       | 12.1   | 18.2 | 11.6                                    | 8.8    | 15.2 | 15.7                         | 13.0   | 18.8 | 17.2                         | 14.7   | 19.9 | 22.1                          | 18.6   | 26.1 | 20.9                          | 18.1   | 24.0 |
| Other                                | 853  | 14.8                     | 10.4   | 20.6 | 15.2                       | 11.0   | 20.6 | 11.6                                    | 5.8    | 21.8 | 11.4                         | 8.7    | 14.8 | 18.9                         | 14.1   | 25.0 | 17.7                          | 13.3   | 23.1 | 16.3                          | 12.1   | 21.7 |
| <2500 grams birthweight <sup>c</sup> | 711  | 10.4                     | 6.9    | 15.4 | 8.7                        | 6.0    | 12.5 | 4.3                                     | 2.5    | 7.2  | 7.7                          | 5.5    | 10.6 | 11.3                         | 8.3    | 15.1 | 16.8                          | 12.8   | 21.8 | 14.1                          | 10.8   | 18.1 |
| 2500-3999 g birthweight              | 6035 | 14.9                     | 13.3   | 16.6 | 14.2                       | 12.6   | 16.0 | 13.7                                    | 11.2   | 16.7 | 13.9                         | 12.4   | 15.4 | 15.5                         | 14.0   | 17.1 | 18.9                          | 17.0   | 21.0 | 17.6                          | 15.9   | 19.4 |
| 4000+ gram birthweight               | 915  | 19.4                     | 14.8   | 25.0 | 20.3                       | 15.7   | 25.9 | 13.7                                    | 7.7    | 23.1 | 16.0                         | 11.8   | 21.5 | 23.1                         | 17.8   | 29.5 | 20.0                          | 15.3   | 25.7 | 15.7                          | 12.4   | 19.7 |

Data source: Early Childhood Longitudinal Study, Kindergarten Class of 1998-1999 (ECLS-K)

a. Fall 1st grade was a sub-sample of entire cohort

b. SES missing in N=310 cases so N stratified by SES does not sum to 7738

c. Birthweight missing N=77 so N stratified by birthweight does not sum to 7738

**Table S2. Inter-wave incidence proportion of obesity, 1998-2007, by weight in Kindergarten  
All Children**

| Study Interval                      | n at risk | TOTAL                                    |        |      | Normal weight at baseline                |        |      | Overweight at baseline                   |        |       |
|-------------------------------------|-----------|------------------------------------------|--------|------|------------------------------------------|--------|------|------------------------------------------|--------|-------|
|                                     |           | Annual incidence proportion <sup>a</sup> | 95% CI |      | Annual incidence proportion <sup>a</sup> | 95% CI |      | Annual incidence proportion <sup>a</sup> | 95% CI |       |
| Fall to Spring K                    | 6807      | 5.4%                                     | 4.0%   | 6.7% | 2.4%                                     | 1.4%   | 3.5% | 19.7%                                    | 13.7%  | 25.6% |
| Spring K to Fall 1st <sup>b</sup>   | 1970      | 3.5%                                     | 1.8%   | 5.2% | 1.3%                                     | 0.1%   | 2.5% | 18.0%                                    | 7.9%   | 28.1% |
| Spring K to Spring 1st <sup>b</sup> | 4656      | 2.7%                                     | 2.0%   | 3.4% | 1.2%                                     | 0.8%   | 1.6% | 10.0%                                    | 6.2%   | 13.7% |
| Fall 1st to Spring 1st <sup>b</sup> | 1950      | 3.1%                                     | 1.2%   | 5.0% | 1.5%                                     | 0.3%   | 2.6% | 14.5%                                    | 1.3%   | 27.6% |
| Spring 1st to Spring 3rd            | 6517      | 3.0%                                     | 2.5%   | 3.6% | 1.7%                                     | 1.4%   | 2.1% | 10.6%                                    | 8.1%   | 13.1% |
| Spring 3rd to Spring 5th            | 6177      | 3.1%                                     | 2.6%   | 3.6% | 2.4%                                     | 1.9%   | 2.9% | 7.8%                                     | 5.5%   | 10.1% |
| Spring 5th to Spring 8th            | 5957      | 1.7%                                     | 1.4%   | 2.0% | 1.4%                                     | 1.1%   | 1.7% | 3.7%                                     | 2.4%   | 5.0%  |

**Boys**

| Study Interval                      | n at risk | TOTAL                                    |        |      | Normal weight at baseline                |        |      | Overweight at baseline                   |        |       |
|-------------------------------------|-----------|------------------------------------------|--------|------|------------------------------------------|--------|------|------------------------------------------|--------|-------|
|                                     |           | Annual incidence proportion <sup>a</sup> | 95% CI |      | Annual incidence proportion <sup>a</sup> | 95% CI |      | Annual incidence proportion <sup>a</sup> | 95% CI |       |
| Fall to Spring K                    | 3356      | 5.4%                                     | 3.7%   | 7.1% | 2.3%                                     | 0.9%   | 3.7% | 20.8%                                    | 13.4%  | 28.1% |
| Spring K to Fall 1st <sup>b</sup>   | 952       | 4.8%                                     | 1.7%   | 7.8% | 2.2%                                     | 0.1%   | 4.5% | 21.3%                                    | 3.2%   | 39.3% |
| Spring K to Spring 1st <sup>b</sup> | 2307      | 2.8%                                     | 1.8%   | 3.8% | 1.6%                                     | 0.8%   | 2.5% | 8.8%                                     | 3.7%   | 13.9% |
| Fall 1st to Spring 1st <sup>b</sup> | 938       | 1.6%                                     | 0.6%   | 2.6% | 0.7%                                     | 0.0%   | 1.5% | 7.9%                                     | 1.5%   | 14.3% |
| Spring 1st to Spring 3rd            | 3208      | 2.9%                                     | 2.2%   | 3.6% | 1.6%                                     | 1.2%   | 2.1% | 10.3%                                    | 7.1%   | 13.5% |
| Spring 3rd to Spring 5th            | 3026      | 3.3%                                     | 2.6%   | 4.0% | 2.7%                                     | 2.0%   | 3.5% | 7.2%                                     | 4.7%   | 9.7%  |
| Spring 5th to Spring 8th            | 2862      | 1.9%                                     | 1.5%   | 2.3% | 1.5%                                     | 1.1%   | 1.9% | 4.8%                                     | 2.5%   | 7.1%  |

## Girls

| Study Interval                      | n at risk | TOTAL                                    |        |      | Normal weight at baseline                |        |      | Overweight at baseline                   |        |       |
|-------------------------------------|-----------|------------------------------------------|--------|------|------------------------------------------|--------|------|------------------------------------------|--------|-------|
|                                     |           | Annual incidence proportion <sup>a</sup> | 95% CI |      | Annual incidence proportion <sup>a</sup> | 95% CI |      | Annual incidence proportion <sup>a</sup> | 95% CI |       |
| Fall to Spring K                    | 3451      | 5.4%                                     | 3.2%   | 7.5% | 2.6%                                     | 0.9%   | 4.3% | 18.6%                                    | 10.1%  | 27.0% |
| Spring K to Fall 1st <sup>b</sup>   | 1018      | 2.2%                                     | 1.0%   | 3.5% | 0.4%                                     | 0.0%   | 0.9% | 14.6%                                    | 5.5%   | 23.7% |
| Spring K to Spring 1st <sup>b</sup> | 2349      | 2.6%                                     | 1.8%   | 3.4% | 0.8%                                     | 0.3%   | 1.2% | 11.1%                                    | 6.1%   | 16.1% |
| Fall 1st to Spring 1st <sup>b</sup> | 1012      | 4.6%                                     | 0.9%   | 8.2% | 2.2%                                     | 0.1%   | 4.3% | 20.7%                                    | -3.2%  | 44.5% |
| Spring 1st to Spring 3rd            | 3309      | 3.2%                                     | 2.4%   | 4.0% | 1.8%                                     | 1.3%   | 2.4% | 10.9%                                    | 7.2%   | 14.5% |
| Spring 3rd to Spring 5th            | 3151      | 2.9%                                     | 2.1%   | 3.8% | 2.1%                                     | 1.4%   | 2.8% | 8.5%                                     | 4.8%   | 12.1% |
| Spring 5th to Spring 8th            | 3095      | 1.4%                                     | 1.0%   | 1.9% | 1.3%                                     | 0.8%   | 1.7% | 2.6%                                     | 1.2%   | 4.0%  |

Data source: Early Childhood Longitudinal Study, Kindergarten Class of 1998-1999 (ECLS-K)

a. Annual incidence proportion is calculated as the # incident obese cases/# at risk / length of interval in years

b. Because a representative sub-sample was followed-up in the Fall of 1st grade, results are reported for each possible interval: Spring K to Fall 1st, Spring K to Spring 1st, and Fall 1st to Spring 1st.

**Supplemental Table S3. Incidence density of obesity between kindergarten and 8th grade, ages 5 to 14 years, by weight in kindergarten**

|                    | All children non-obese at baseline      |        |      |            | Children normal weight at baseline     |        |      |            | Children overweight at baseline        |        |       |            | Overweight: Normal weight at baseline incidence ratio |        |      |
|--------------------|-----------------------------------------|--------|------|------------|----------------------------------------|--------|------|------------|----------------------------------------|--------|-------|------------|-------------------------------------------------------|--------|------|
|                    | (n=6807 at risk followed for 50,396 PY) |        |      |            | n=5675 at risk followed for 44,364 PY) |        |      |            | (n=1132 at risk followed for 6,032 PY) |        |       |            | IDR                                                   | 95% CI |      |
|                    | Rate (cases per 1,000 PY)               | 95% CI |      | p-value    | Rate (cases per 1,000 PY)              | 95% CI |      | p-value    | Rate (cases per 1,000 PY)              | 95% CI |       | p-value    |                                                       |        |      |
| Total Cohort       | 26.5                                    | 23.9   | 29.0 |            | 17.2                                   | 15.0   | 19.3 |            | 91.5                                   | 75.8   | 107.2 |            | 5.3                                                   | 4.3    | 6.6  |
| BOYS               | 27.5                                    | 24.3   | 30.8 | <i>ref</i> | 18.6                                   | 15.8   | 21.4 | <i>ref</i> | 89.9                                   | 68.7   | 111.1 | <i>ref</i> | 4.8                                                   | 3.7    | 6.4  |
| GIRLS              | 25.3                                    | 21.6   | 29.1 | 0.363      | 15.6                                   | 12.4   | 18.9 | 0.160      | 93.1                                   | 71.8   | 114.5 | 0.826      | 6.0                                                   | 4.4    | 8.1  |
| SES Quintile 1     | 30.1                                    | 23.2   | 36.9 | 0.000      | 20.6                                   | 15.0   | 26.3 | 0.001      | 80.0                                   | 52.0   | 108.1 | 0.674      | 3.9                                                   | 2.5    | 6.0  |
| SES Quintile 2     | 31.6                                    | 25.1   | 38.1 | 0.000      | 23.1                                   | 17.0   | 29.3 | 0.002      | 86.7                                   | 48.0   | 125.4 | 0.545      | 3.8                                                   | 2.2    | 6.4  |
| SES Quintile 3     | 34.5                                    | 27.6   | 41.4 | <0.001     | 22.5                                   | 16.9   | 28.1 | 0.000      | 114.4                                  | 70.3   | 158.5 | 0.122      | 5.1                                                   | 3.3    | 7.9  |
| SES Quintile 4     | 23.6                                    | 18.1   | 29.1 | 0.020      | 12.3                                   | 8.3    | 16.3 | 0.389      | 109.7                                  | 71.9   | 147.6 | 0.128      | 8.9                                                   | 5.7    | 14.0 |
| SES Quintile 5     | 16.1                                    | 12.1   | 20.0 | <i>ref</i> | 10.0                                   | 6.3    | 13.7 | <i>ref</i> | 71.7                                   | 44.6   | 98.9  | <i>ref</i> | 7.2                                                   | 4.2    | 12.2 |
| Non-Hispanic White | 22.2                                    | 19.3   | 25.0 | <i>ref</i> | 14.7                                   | 12.2   | 17.2 | <i>ref</i> | 80.4                                   | 61.9   | 98.9  | <i>ref</i> | 5.5                                                   | 4.0    | 7.4  |
| Non-Hispanic Black | 34.9                                    | 23.9   | 45.8 | 0.034      | 21.4                                   | 13.3   | 29.5 | 0.118      | 122.3                                  | 66.6   | 177.9 | 0.166      | 5.7                                                   | 3.6    | 9.0  |
| Hispanic           | 34.2                                    | 27.2   | 41.2 | 0.002      | 22.7                                   | 17.2   | 28.3 | 0.012      | 95.8                                   | 63.6   | 127.9 | 0.385      | 4.2                                                   | 3.0    | 5.9  |
| Other              | 25.4                                    | 17.6   | 33.2 | 0.464      | 16.2                                   | 10.6   | 21.7 | 0.632      | 88.2                                   | 33.5   | 142.8 | 0.800      | 5.5                                                   | 2.9    | 10.2 |
| Birth weight       |                                         |        |      |            |                                        |        |      |            |                                        |        |       |            |                                                       |        |      |
| <2500 grams        | 22.8                                    | 16.8   | 28.8 | 0.362      | 17.9                                   | 12.3   | 23.5 | 0.850      | 74.6                                   | 28.3   | 120.9 | 0.565      | 3.6                                                   | 1.8    | 7.2  |
| 2500-3999 grams    | 26.2                                    | 23.0   | 29.5 | <i>ref</i> | 17.3                                   | 14.6   | 20.0 | <i>ref</i> | 89.0                                   | 72.0   | 105.9 | <i>ref</i> | 5.1                                                   | 4.1    | 6.5  |
| 4000+ grams        | 34.3                                    | 23.7   | 45.0 | 0.168      | 15.4                                   | 9.3    | 21.6 | 0.601      | 129.8                                  | 75.8   | 183.9 | 0.148      | 8.4                                                   | 4.8    | 14.9 |

Data source: Early Childhood Longitudinal Study, Kindergarten Class of 1998-1999 (ECLS-K)

Incidence density calculated as the incident cases between 2 waves/ Person-years lived between the 2 waves (PY)

IDR: Incidence density ratio

**Table S4: Proportion of incident obese 8th graders by weight in kindergarten**

| <b>Kindergarten weight</b> | n at risk of obesity in kindergarten | % of obese 8th graders | 95% CI |       |
|----------------------------|--------------------------------------|------------------------|--------|-------|
| Total                      | 6807                                 |                        |        |       |
| Normal                     | 5675                                 | 54.68                  | 48.67  | 60.55 |
| Overweight                 | 1132                                 | 45.32                  | 39.45  | 51.33 |

Data source: Early Childhood Longitudinal Study, Kindergarten Class of 1998-1999 (ECLS-K)
